# Supplementary material for: The urea-creatinine ratio on the seventh day predicts the short-term prognosis of spontaneous intracerebral hemorrhage: a retrospective study
Source: PeerJ. 2025 Aug 18;13:e19874. doi: 10.7717/peerj.19874 (PMC12369599; doi:10.7717/peerj.19874)
Supplement: Supplemental Information 1 — Original, unprocessed data collected from the Department of Neurology, the First Affiliated Hospital of Chongqing Medical University for the study, including the participants’ baseline clinical indicators, demographic information, and initial laboratory test results. [file peerj-13-19874-s001.xlsx]

## Sheet: Sheet1
Gender	Age	Hospitalization_time	Bleeding_site	mRS_group	Intraventricular_extension	Hematoma_shape	Bleeding_volume	GCS	Urine_specific_gravity	WBC	HB	PLT	Neutrophils_Absolute Value	Lymphocytes_Absolute Value	NLR	PT	APTT	FIB	Alb	ALT	AST	Ca	K	Na	BCR_day1	BCR_day7	BCR_group(30.68)
1	78	30.4563	2	2	2	1	3.57	12	1.011	11.38	171	169	8.93	1.09	8.19266	11.3	25.9	3.36	40	24	25	2.17	3.3	139	12.1425	52.7844	2
2	76	11.9185	2	2	1	1	1.98	7	1.028	11.39	112	180	9.45	0.97	9.74227	11	24.2	5.06	38	16	27	2.22	4.1	137	57.3204	51.408	2
2	58	24.0299	2	2	1	1	14.145	11	1.028	7.85	131	213	6.39	1.06	6.0283	12	29.8	2.37	40	25	25	2.2	4	136	14.5369	49.129	2
2	57	12.6911	2	2	1	1	16.4	12	1.037	8.21	122	294	6.19	1.47	4.21088	10.7	27	2.07	41	41	32	2.29	3.9	139	18.833	48.9989	2
1	82	11.541	2	2	1	1	1.9125	14	1.031	8.55	137	223	6.6	1.188	5.55556	13	28.8	3.34	37	21	27	2.25	3.1	140	29.3248	48.62	2
2	91	51.9792	2	2	1	1	7	13	1.018	3.82	123	188	2.37	1.14	2.07895	10.1	22.4	6.86	42	16	25	2.13	3.5	138	15.912	48.0896	2
2	72	22	2	2	1	1	18.48	15		8.99	137	164	7.25	1.17	6.19658	11.2	23.3	2.33	49	31	24	2.37	3.6	142	14.7714	47.8539	2
1	67	24.0627	2	2	1	1	1.68	11	1.026	11.98	154	230	10.51	0.81	12.9753	12.1	28.5	4.37	45	26	40	2.37	3.6	142	34.0788	45.6365	2
2	73	7	2	1	1	1	1	15	1.03	11.59	128	245	9.85	1.27	7.75591	11.4	23.7	3.29	44	22	24	2.3	4.1	140	30.94	44.784	2
2	52	15	2	2	2	1	12.4	13		9.44	149	205	7.37	1.64	4.4939	11	23.1	3.09	42	34	30	2.24	4	137	28.56	44.0392	2
2	90	12	2	2	2	2	2	13	1.028	8.46	137	226	4.68	2.98	1.57047	10.6	22.6	2.32	43	27	35	2.11	3.2	136	34.034	43.68	2
1	65	13.952	2	2	1	1	12.3	14	1.032	6.72	174	208	5.14	1.03	4.99029	10.6	24.4	3.54	34	26	30	2.15	4	133	19.6891	42.8914	2
1	59	22.6417	2	2	1	1	25.2	12	1.05	4.55	122	90	3.74	0.053	70.566	13.6	29.8	2.31	42	22	32	2.16	4.3	138	14.0162	42.535	2
2	68	8.789	2	1	1	1	0.5	15	1.025	4.22	131	153	2.49	1.37	1.81752	10.6	24.4	2.98	48	46	43	2.39	3.6	142	34.7581	42.0673	2
1	45	23	2	2	1	1	11.2	13	1.032	7.57	148	287	3.88	3.06	1.26797	10.7	24	1.58	46	25	25	2.32	3.5	142	15.6328	42.0317	2
1	64	24.0634	2	2	1	1	17.82	13	1.018	6.69	170	137	3.95	2.18	1.81193	11.3	25.6	2.53	38	55	72	2.13	3.1	137	14.9543	40.6088	2
2	74	21.5896	2	2	1	1	9	15	1.039	9.41	142	145	7.75	0.96	8.07292	10.1	23.9	2.18	46	22	27	2.17	3.7	137	31.2657	40.5033	2
2	65	17.8472	2	2	1	1	5.2	14	1.03	10.03	145	298	8.05	1.39	5.79137	11.1	26.1	6.63	51	23	29	2.41	3.6	143	19.8766	40.3104	2
2	68	7.95227	2	2	1	1	4.05	14	1.014	7.11	125	174	4.5	2.34	1.92308	11.2	25.4	2.86	39	16	16	2.19	4.2	138	25.8771	39.4322	2
2	67	14	2	2	1	1	3.52	15		7.46	119	207	4.46	2.34	1.90598	12.2	25.3	4.29	35	17	19	2.08	3.7	143	32.6726	38.012	2
1	48	10	2	1	1	1	3.402	14	1.033	7.89	157	96	5.24	2.12	2.4717	10.6	25	1.41	40	19	31	2.21	3.9	140	17.1667	37.8996	2
1	80	57.9076	2	2	1	1	21	13	1.025	10.99	153	156	7.77	2.01	3.86567	11.8	29	3.68	48	27	32	2.38	3.8	140	18.0544	37.5732	2
1	76	15	2	2	2	2	6.12	5	1.019	13.74	121	247	10.99	1.92	5.72396	9.9	21.3	2.78	47	69	63	2.19	4.1	137	16.8041	37.503	2
1	74	21.6847	2	1	1	1	17.29	13	1.031	5.97	125	44	3.89	1.47	2.64626	11.9	26.4	3.61	49	30	31	2.31	3.8	141	17.9239	37.2572	2
1	80	12.4747	2	2	1	1	0.675	13	1.025	5.38	132	200	3.85	0.79	4.87342	12.5	25.6	3.75	30	16	23	2.11	3.9	140	26.208	36.7288	2
2	85	9.59101	2	2	1	1	0.77	14		5.54	124	206	4.08	0.97	4.20619	11.5	28	3.54	43	20	26	2.31	3.5	139	22.7231	36.6756	2
2	63	23.5679	2	2	1	1	15.84	8	1.024	8.55	105	101	7.08	0.87	8.13793	12.7	24.4	4.68	49	24	31	2.25	3.5	139	25.302	36.6696	2
2	87	7	2	1	1	1	2.4225	14	1.014	9.98	124	163	5.69	2.91	1.95533	10.8	24.8	2.09	33	21	34	2.18	4.2	138	19.8016	35.9218	2
2	55	12	2	2	1	1	1.6575	15	1.022	4.95	132	177	2.65	1.89	1.40212	10.9	25.2	2.29	43	12	21	1.79	3.7	136	12.5554	35.6908	2
1	49	16.4986	2	1	1	1	2.52	15	1.05	13.36	160	215	11.52	2.33	4.94421	10.8	27.2	4.665	39	29	32	2.25	4	136	29.9087	35.2945	2
2	74	14.9514	2	2	1	1	8	14	1.038	8.02	133	215	6.31	1.23	5.13008	10.6	24.4	2.55	42	14	29	2.25	4	146	19.3066	35.2716	2
2	89	6.70139	2	1	1	1	3.375	14	1.027	5.88	92	240	4.42	1.01	4.37624	10.9	24	4.09	40	30	44	2.36	3.6	137	27.7222	34.4011	2
1	73	11	2	1	1	1	1.596	14	1.03	8.93	128	250	7.05	1.23	5.73171	12.7	25.2	4.59	39	26	19	1.99	4	139	21.3767	34.2973	2
1	59	21	2	1	1	1	5.5	15	1.05	9.36	171	192	8.75	0.35	25	11.2	23.2	4.96	45	10	14	2.16	4.6	138	25.686	34.0924	2
2	72	11.7094	2	1	1	1	5.625	14	1.022	5.92	125	393	4.13	1.3	3.17692	11.9	28.7	3.09	42	26	34	2.35	4	143	22.4169	33.9733	2
1	75	26.7392	2	2	2	2	17.5	15	1.028	8.01	105	57	7	0.46	15.2174	11.6	27.1	2.93	37	24	29	2.02	4	135	17.9452	33.9414	2
1	62	9.44653	2	1	1	1	3	15	1.028	5.61	142	153	3.6	1.47	2.44898	10	26.3	2.87	41	44	33	1.97	5.9	131	27.132	33.8921	2
1	75	37	2	1	1	1	6	15	1.033	4.97	145	133	3.68	0.89	4.13483	11.4	24.8	2.17	41	15	23	2.22	4.2	139	20.0373	33.77	2
1	63	21.7411	2	1	1	1	15.8025	13	1.03	9.08	150	174	7.86	0.74	10.6216	10.9	23.2	1.46	39	23	26	2.14	3.8	137	29.7024	33.6627	2
1	67	9.46667	2	1	1	1	14	14	1.031	7.09	148	175	5.38	1.3	4.13846	12.1	28.9	2.44	43	13	21	2.15	3.8	141	21.8208	33.5071	2
1	59	38	2	2	1	1	6	6	1.04	10.52	169	221	5.9	3.84	1.53646	10.3	27.2	3.26	46	25	28	2.18	3.8	141	12.376	33.4761	2
2	59	16.3653	2	1	1	1	24	15	1.019	9.15	139	286	7.22	1.43	5.04895	11.1	22.9	2.7	47	28	32	2.35	4	139	26.0547	33.3394	2
2	68	6.72153	2	1	1	1	8.4375	15	1.028	6.2	114	135	4.12	1.32	3.12121	12	24.6	4.54	38	13	21	2.2	4	140	25.3708	33.1902	2
2	57	18	2	1	1	1	11.76	15		6.52	144	189	5.19	0.87	5.96552	11.3	24	2.56	45	18	21	2.27	4	144	19.8016	33.1575	2
2	77	13	1	2	1	1	1.35	15	1.013	5.38	129	196	3.59	1.27	2.82677	12.1	26.6	2.94	44	18	33	2.12	3.6	138	18.4323	32.785	2
1	68	34	2	2	1	1	19.25	8	1.022	8.08	143	151	6.99	0.84	8.32143	11.8	25	3.08	40	18	24	2.22	2.5	142	23.205	32.723	2
2	57	9	2	1	1	1	13	15	1.012	3.88	134	201	2.55	0.96	2.65625	10.7	24.4	2.76	50	8	18	2.72	4.3	143	25.7421	32.7094	2
2	79	21.057	2	2	1	1	3.8	14	1.018	12.09	125	139	10.54	0.82	12.8537	10.3	21.9	2.82	45	37	32	2.39	4.2	139	21.9499	32.3035	2
2	52	11.5544	2	1	1	1	4	15	1.032	6.03	130	216	4.27	1.08	3.9537	11.8	29.6	2.57	40	24	24	2.15	4	140	18.4515	32.2712	2
2	91	15	2	2	1	1	5.04	15	1.036	9.2	133	236	6.03	2.55	2.36471	11	23.7	3.04	39	14	20	2.28	3.6	139	23.7207	32.1776	2
1	69	14	2	1	1	1	0.64	15	1.01	4.42	131	141	2.21	1.53	1.44444	12.1	26.9	2.21	34	21	31	2.08	3.9	140	13.1593	32.0309	2
2	52	11.5826	2	2	1	1	3.96	13		5.8	128	201	2.92	2.35	1.24255	11.4	26.2	2.83	42	22	28	2.47	3.8	138	15.8856	31.9583	2
2	56	25	2	2	1	1	10.545	12		7.44	140	228	6.01	1.1	5.46364	11.2	24.5	1.64	43	18	23	2.28	4.2	136	17.8041	31.824	2
1	94	14	2	2	1	1	1.5675	12	1.041	7.28	106	211	4.92	1.44	3.41667	12.9	31.7	2.74	32	15	26	1.98	3.2	141	14.9147	31.7784	2
2	87	12	2	1	2	1	3.75	15	1.012	7.06	112	187	4.88	1.71	2.8538	12.1	25.6	3.38	43	15	25	2.13	3.2	138	18.9658	31.5025	2
2	79	16	2	2	2	1	4.692	13		6.25	113	198	4.05	1.94	2.08763	11.1	23	2.23	40	16	29	2.2	3.7	142	27.6887	31.416	2
1	51	12.8944	2	1	1	1	9	15	1.026	8.37	133	275	0.86	1.19	0.722689	11.6	24.7	6.88	45	92	69	2.5	5.4	131	23.6007	31.0582	2
1	69	22	2	2	1	1	23.04	13	1.022	12.01	140	153	9.56	1.23	7.77236	11.8	26.1	3.59	34	46	46	2.09	3.7	144	40.4676	30.7266	2
2	56	11.9778	2	1	1	1	5.13	15	1.047	7.66	140	244	5.38	1.56	3.44872	11.6	27.6	4.27	44	19	21	2.38	3.9	140	21.3248	30.6273	1
2	73	11	2	1	2	1	3.45	15	1.023	10.64	140	316	7.88	2.19	3.59817	10.5	27.6	3.39	42	19	24	2.29	4.1	143	14.0949	30.2042	1
1	77	14.016	1	1	1	1	1.43	15	1.036	8	140	197	7.31	0.41	17.8293	10.7	25.3	1.95	38	23	25	2.1	4	c	37.128	30.1149	1
2	86	12	2	1	1	1	2.04	14		3.75	120	123	2.3	0.97	2.37113	11.8	24.8	2.53	37	51	72	2.26	4	140	23.426	30.0496	1
2	90	11	2	2	1	1	3.06	12		4.64	120	210	3.29	0.96	3.42708	11.5	26.9	3.09	39	16	29	2.22	4.3	142	26.299	30.0324	1
1	57	11.8812	1	1	1	1	3	15	1.037	13.92	139	205	11.62	1.63	7.12883	11.1	24.3	1.9	41	14	17	2.25	4.1	143	15.1029	29.9962	1
1	61	32.3502	2	2	1	1	30.24	9	1.026	12.36	145	216	9.64	1.95	4.94359	11.5	25.5	2.49	46	37	31	2.4	4	139	15.6964	29.8638	1
1	70	15.5161	2	1	1	1	13.86	15	1.05	7.76	134	177	6.04	0.99	6.10101	12.1	25.8	2.02	40	22	28	2.19	3.7	133	28.419	29.7863	1
1	70	16	2	1	2	2	1.722	14	1.033	7.88	150	135	6.42	0.74	8.67568	11.2	24.5	2.65	40	17	25	2.13	4.1	141	16.8416	29.6003	1
2	61	19	1	1	1	1	4.32	15	1.05	10.79	109	202	9.04	1.14	7.92982	11	22.8	4.51	42	81	38	2.22	3.8	141	20.944	29.512	1
1	52	22	2	1	1	1	21.42	13	1.03	5.16	147	184	3.08	1.8	1.71111	11	36.4	1.84	46	27	30	2.24	3.4	138	18.564	29.3488	1
1	53	12	2	2	1	1	14.875	14	1.045	4.1	137	234	2.53	1.28	1.97656	11.4	25.8	2.69	44	20	27	2.26	3.6	138	19.9494	29.2211	1
2	56	21.3313	2	1	2	2	14.625	14	1.037	10.8	135	313	9.98	0.64	15.5938	11.4	26	3.23	48	31	26	2.35	3.1	136	23.7207	29.2074	1
1	83	17	2	2	2	1	10	14	1.05	6.49	121	160	5.01	0.93	5.3871	10.5	24.7	3.78	35	15	25	2.04	3.7	137	22.1268	28.8348	1
2	56	22	2	1	2	2	11	14	1.037	8.57	107	162	7.18	0.73	9.83562	11.8	23.7	3.36	49	12	14	2.32	3.8	141	16.5013	28.7658	1
1	59	22.7486	2	2	1	1	18.87	11		5.09	149	144	2.96	1.65	1.79394	11.8	29.6	1.85	42	74	46	2.26	3.8	137	20.6267	28.7443	1
2	65	13	2	1	1	1	3.84	15	1.023	6.96	118	180	4.23	2.19	1.93151	10.3	28.3	2.69	40	17	22	2.13	3.1	140	33.9194	28.73	1
1	68	10.9209	2	1	1	1	0.75	14	1.018	7.42	146	173	5.64	0.79	7.13924	10.7	30.5	4.77	46	32	25	2.36	4.6	141	26.208	28.7269	1
1	74	11	1	1	1	1	1	15		4.82	134	246	2.53	1.33	1.90226	11.7	28.4	2.81	42	11	22	2.44	3.9	141	28.288	28.6974	1
2	73	18.1639	2	2	2	1	10.08	15	1.029	10.51	137	214	9.13	0.83	11	10	25.7	4.12	44	27	20	2.29	3.8	140	24.285	28.6602	1
2	64	12	2	1	1	1	0.855	15	1.012	4.92	128	208	3.24	1.15	2.81739	12.1	25.8	3.73	43	22	32	2.29	2.7	141	38.08	28.56	1
1	88	37.6382	2	2	1	1	2	14	1.026	7.1	152	250	4.88	1.69	2.88757	14.2	29.3	4.33	31	19	26	2.12	3.5	144	35.9678	28.4506	1
2	55	16.8965	2	2	2	1	30.38	11	1.035	5.14	143	257	3.5	1.3	2.69231	12.5	26.7	1.99	42	32	25	2.22	3.7	137	14.2688	28.4085	1
1	51	14.0134	2	1	1	1	19.14	11	1.039	7.5	149	143	6.62	0.69	9.5942	11.5	24.9	2.75	47	40	31	2.21	4	140	30.8314	28.288	1
1	59	13.0097	2	1	1	1	3.575	15	1.023	6.46	130	205	3.68	2.11	1.74408	11.8	24.5	2.6	45	17	16	2.34	4	142	12.376	28.1741	1
1	58	15	2	1	1	1	5.5	15		8.2	158	136	5.58	1.96	2.84694	11.1	24.5	2.86	45	28	30	2.34	3	141	10.829	28.0805	1
2	84	25	2	1	1	1	3.4125	15	1.01	3.1	124	140	1.79	0.95	1.88421	11.5	25.9	2.61	39	10	19	2.22	4	138	26.0547	27.7211	1
1	71	14.7414	2	1	1	1	4.725	14	1.045	5.56	171	182	3.66	1.47	2.4898	10.5	29.2	2.15	44	15	22	2.32	3.8	140	19.1415	27.5994	1
1	63	20	2	1	1	1	8.505	13	1.042	6.77	152	96	4.55	1.28	3.55469	11.3	33.8	2.96	41	20	30	2.04	3.8	140	17.4274	27.4424	1
1	62	15.8604	2	1	1	1	1.5	13	1.038	4.21	139	244	3.04	0.74	4.10811	11.4	28.8	3.09	40	35	25	2.25	3.8	138	16.9534	27.329	1
1	61	9.72913	2	1	1	1	3.12	15	1.03	9.44	157	271	6.48	2.46	2.63415	11	25.6	2.41	49	31	22	2.36	3.6	144	20.0621	27.121	1
2	56	25.5924	2	2	1	1	8.82	10		7.57	120	91	4.11	2.47	1.66397	11.6	24.9	2.16	34	16	27	2.25	2.7	134	28.56	27.1093	1
2	76	9.22778	2	2	1	1	9.8	8	1.042	7.58	134	180	4.46	2.16	2.06481	10.4	25.6	2.98	37	31	25	2.33	3.4	145	23.4068	27.0969	1
2	57	14.9257	2	1	2	1	3.91	15	1.038	6.82	122	185	3.92	2.33	1.6824	10.8	26.5	3.27	42	32	32	2.29	4	140	27.5022	27.0439	1
1	75	20.6881	2	1	2	2	4	15	1.027	12	147	154	10.49	0.9	11.6556	11.1	23	3.03	46	23	29	2.4	4.1	139	28.5868	26.8395	1
1	59	22	2	1	1	1	6.75	15	1.033	12.09	113	384	7.52	3.52	2.13636	10.6	23.2	4.83	45	20	15	2.62	3.9	145	11.9768	26.7809	1
2	90	11	2	2	1	1	0.975	15		6.87	135	297	4.48	1.52	2.94737	11.1	21.5	4.14	44	15	28	2.48	3.5	145	24.95	26.7435	1
1	61	6.72431	2	1	1	1	5.3125	15	1.025	5.24	140	138	2.83	1.84	1.53804	10.7	26	2.28	42	14	16	2.48	3.6	142	14.0162	26.6821	1
1	60	22	2	1	1	1	7.83	14	1.049	5.13	156	174	3.15	1.53	2.05882	12	26.5	2.86	39	16	23	2.18	4	142	16.4054	26.656	1
1	61	7	2	1	1	1	1.904	15	1.015	5.7	142	276	4.14	1.23	3.36585	11.2	24.8	3.57	40	15	16	2.14	3	145	11.8531	26.4578	1
1	55	19	2	1	1	1	9.8	14	1.041	7.94	141	167	6.25	1.14	5.48246	10	22.1	2.32	42	28	35	2.22	3.9	142	25.8053	26.1271	1
1	59	12.7233	2	1	1	1	7.568	15	1.029	7.75	148	161	6.39	0.69	9.26087	11.5	28.3	3.7	38	37	22	2.14	4	128	15.0135	25.955	1
1	40	8.90347	2	1	1	1	1	15	1.017	9.4	138	358	5.85	2.68	2.18284	10.6	26.5	2.66	43	41	28	2.24	3.7	139	9.47949	25.8576	1
2	55	21.8542	2	1	1	1	23.04	15	1.019	10.71	141	331	9.41	0.94	10.0106	11.9	29.5	3.34	44	12	18	2.38	4.3	141	16.1576	25.7598	1
2	83	26	2	2	1	1	4.6875	13	1.029	5.02	129	198	2.57	1.96	1.31122	11.4	28	2.64	38	13	26	2.07	3.2	137	21.0655	25.2373	1
1	74	45	2	1	1	1	12	15		7.53	159	177	5.25	1.67	3.14371	11	25.7	2.92	45	19	31	2.12	5.3	138	25.5378	25.1006	1
1	71	10	2	2	2	1	12.285	9		6.71	107	130	4.67	1.52	3.07237	13.7	30	1.7	30	103	94	1.92	3.3	138	12.1796	24.752	1
1	59	14.9431	2	1	2	2	12	14	1.032	9.76	141	179	8.22	0.77	10.6753	11.5	28.5	2.51	44	22	20	2.24	3.9	147	10.1029	24.752	1
1	67	9	2	1	2	1	6.51	15	1.032	11.45	141	325	9.66	0.8	12.075	12.1	28.4	3.32	47	23	21	2.34	3.3	137	20.8231	24.5791	1
1	58	11.9188	2	1	1	1	3.78	15	1.015	6.09	150	220	2.35	2.664	0.882132	11.6	28	2.5	36	17	19	2.24	3.9	141	16.016	24.5343	1
1	79	11.9076	2	1	1	1	1	14	1.025	4.82	112	132	3.01	1.07	2.81308	12.5	27.4	3.9	36	13	13	2.1	3.8	141	17.472	24.3933	1
2	63	9.89722	2	1	2	1	7.56	15	1.041	7.97	132	182	7	0.7	10	11.1	23.3	3.06	44	19	19	3.29	3.6	131	30.7891	24.3298	1
1	63	24	2	1	2	1	13.68	12	1.027	13.54	149	188	11.32	1.46	7.75342	10.3	25.3	2.64	42	40	30	2.18	3.3	138	11.5509	24.2936	1
1	69	27	2	2	2	1	6.63	9	1.039	11.6	129	209	10.46	0.34	30.7647	12.2	32.8	5.88	39	7	18	2.15	3.6	143	29.8731	24.276	1
2	82	17.6997	1	2	1	1	2.04	6	1.05	11.51	123	265	10.13	0.93	10.8925	12.2	22.9	3.28	39	26	15	2.34	4.1	139	25.7833	24.2619	1
2	57	13.4467	2	1	1	1	15	9	1.023	7.46	136	120	6.02	1	6.02	11.9	23.6	2.66	44	11	15	2.05	3.7	140	20.111	24.1483	1
2	75	11	2	2	2	1	17.94	8		7.51	118	162	5.78	1.12	5.16071	11.8	26.2	2.82	44	29	23	2.22	3.6	137	16.6303	24.0739	1
2	60	22.9876	2	2	1	1	7.02	13	1.021	8.32	144	210	6.22	1.7	3.65882	11.8	29	2.78	48	30	31	2.31	4	139	18.9015	23.9535	1
1	58	17	2	2	1	1	6.0375	11	1.019	14.11	154	217	12.52	0.82	15.2683	10.8	22.3	2.06	44	21	25	2.24	3.7	142	23.8121	23.9177	1
2	85	23	2	2	2	2	6.075	13		9.61	114	151	8.75	0.42	20.8333	12.1	23.7	3.32	33	12	21	2.02	4.4	123	16.2168	23.8353	1
2	82	16	2	1	1	1	6.27	15	1.028	5.53	124	119	4.06	1.11	3.65766	11	26.5	3.65	47	11	13	2.36	3.5	140	18.1515	23.8353	1
1	54	11.9419	2	2	1	1	23.8	12	1.026	14.9	145	260	13.8	0.86	16.0465	10.5	24.5	2.69	43	23	23	2.2	3.6	137	31.1396	23.8166	1
1	87	8.49375	2	2	1	1	7.22	14	1.034	4.52	122	123	2.56	1.19	2.15126	13.2	30.2	5	37	18	20	2.21	4	139	20.6789	23.6354	1
1	35	27	2	1	1	1	27.9	15		14.84	183	298	12.33	1.68	7.33929	11.2	29.4	2.03	50	29	25	2.52	3.9	142	21.159	23.6269	1
1	86	102.007	2	1	2	1	4	15	1.021	6.91	117	188	4.91	1.03	4.76699	12.2	31.1	2.93	35	24	29	2.09	3.6	139	21.6254	23.5387	1
1	78	16.5791	2	2	2	1	22.68	15	1.035	5	128	160	2.21	2.12	1.04245	11.6	23.6	3.21	39	28	33	2.17	3.6	142	21.7818	22.9584	1
1	53	16	2	1	1	1	12.9	15	1.046	7.91	134	197	5.98	1.19	5.02521	10.9	23.4	3.33	42	13	20	2.26	3.6	136	40.5033	22.5698	1
1	60	13	2	2	1	1	2.04	13		13.25	149	313	11.18	1.31	8.53435	10.9	27.3	4.2	40	15	22	2.45	4.2	142	26.6858	22.2715	1
1	41	7	2	1	1	1	14.875	15	1.032	10.76	159	285	6	3.9	1.53846	11.2	27.7	2.3	48	29	19	2.03	3.7	138	13.4073	22.2351	1
1	58	20	2	1	1	1	17.01	15		8.88	172	234	6.48	1.55	4.18065	11.4	24.1	2.9	40	26	32	2.32	3.6	141	34.1813	22.0018	1
1	82	19.8953	2	1	1	1	2.24	13	1.014	5.99	142	168	4.31	1.2	3.59167	12.3	27.1	4.63	38	18	27	2.32	3.8	141	17.4939	21.9719	1
1	50	21	2	1	1	1	11.44	14	1.035	7.54	157	241	4.05	2.87	1.41115	11.1	27.7	2.34	48	42	42	2.27	4.6	138	8.92223	21.9322	1
1	55	24	2	1	1	1	20.445	14	1.008	5.31	138	298	3.28	1.52	2.15789	11.5	26.5	3.39	37	20	19	2.27	4.1	142	15.232	21.9322	1
2	34	24.3843	2	1	1	1	12.09	14	1.032	12.22	129	181	11.57	0.48	24.1042	12.1	22.1	2.61	50	18	29	2.12	4.4	137	14.144	21.8643	1
1	60	16	2	1	1	1	8.575	14	1.05	9.71	149	194	6.63	2.4	2.7625	10.9	24.9	2.61	42	16	24	2.26	4.2	139	17.8976	21.8153	1
1	53	21.716	2	1	1	1	13.2	12	1.049	10.16	145	119	8.52	1.16	7.34483	12	29.7	4.27	38	24	20	2.24	3.9	140	23.7619	21.8053	1
1	28	9.79956	2	1	2	1	7.44	15	1.036	10.13	164	241	8.33	1.18	7.05932	11.5	28.8	2.45	51	19	21	2.48	4	141	15.2581	21.6516	1
1	55	9.78331	2	1	1	1	5.95	14	1.039	7.3	169	168	4.61	1.78	2.58989	11.1	26.4	2.85	44	54	26	2.23	4.2	144	17.7632	21.5885	1
2	56	12.0647	2	1	1	1	13.6	15	1.022	6.66	125	157	5.14	1.11	4.63063	9.8	25.7	2.35	43	37	33	2.27	3.7	141	31.2347	21.4829	1
1	75	13	2	1	1	1	2.64	13	1.022	4.97	149	201	3.12	1.19	2.62185	11	26.9	3.44	38	10	15	2.22	4	139	7.17808	21.1767	1
1	59	12.7409	2	2	2	1	13.6	11	1.018	8	150	204	5.29	1.56	3.39103	8.4	25.7	3.15	39	17	25	2.23	3.7	139	12.1966	21.085	1
1	66	28	2	2	2	2	7.84	14	1.017	8.52	140	112	7.65	0.54	14.1667	11.2	25.4	3.23	46	14	21	2.25	3.1	141	15.8138	20.9112	1
1	82	17	2	2	1	1	6.8	15		5.78	133	122	2.92	1.96	1.4898	11	26.2	3.78	32	17	27	2.06	3.2	140	16.7305	20.8845	1
1	60	16	2	1	1	1	4.41	15	1.04	8.16	149	197	5.72	1.73	3.30636	11.2	26.8	1.58	44	25	26	2.25	3.7	139	28.7123	20.7532	1
2	68	11	2	1	1	1	0.975	15	1.026	6.84	130	193	4.89	1.48	3.30405	10.4	24.9	2.98	41	13	21	2.32	4.1	142	22.9472	20.6728	1
1	66	16	2	1	1	1	4.056	15	1.023	5.27	142	203	2.67	2.11	1.2654	11.9	25.3	2.46	42	17	23	2.27	4.3	139	25.9123	20.5656	1
1	65	10.9826	2	2	1	1	9.435	10	1.039	8.31	145	227	5.78	1.88	3.07447	11.4	26.2	3.28	41	24	29	2.28	3.5	138	15.1029	20.4739	1
2	91	9	2	1	1	1	21.735	12		10.74	138	291	7.22	2.41	2.99585	11.3	29.4	4.1	40	17	20	2.36	4.4	141	24.285	20.384	1
1	73	8.88958	2	1	1	1	4	15	1.027	4.43	114	151	3.06	0.64	4.78125	11.1	28.1	2.98	39	23	21	2.19	4.1	137	18.8218	20.0983	1
1	48	23.7847	2	1	1	1	24.6	14	1.05	11.2	151	168	9.35	1.12	8.34821	11.4	26.2	4.27	39	33	25	2.19	3.4	140	17.5075	20.0928	1
1	42	18.0042	2	1	2	2	11	15	1.043	10.64	164	150	9.35	0.56	16.6964	11.3	29.2	5.1	43	15	19	2.19	3.1	137	13.2011	20.005	1
1	61	169.1	2	2	1	1	9	13	1.012	6.41	133	131	4.72	0.88	5.36364	11.4	25.5	3.15	40	20	15	2.1	5.5	144	4.91261	20.0042	1
1	65	17.6495	2	1	1	1	17.325	12	1.016	5.35	124	239	3.74	1.2	3.11667	12.5	29.7	3.08	40	27	24	2.23	3.4	138	9.34514	19.9458	1
1	53	17.2979	2	1	2	1	7.14	15	1.034	11.12	161	227	8.08	2.01	4.0199	12.3	26.2	4.16	46	42	30	2.24	3.6	132	25.686	19.9092	1
1	66	10.7199	2	1	1	1	2.08	15	1.013	7.59	148	223	6.28	0.89	7.05618	10.2	25.9	2.64	37	26	28	2.24	3.8	136	24.4305	19.8368	1
2	57	23	2	1	1	1	6.93	15	1.014	11.6	133	181	10.46	0.72	14.5278	11.2	25.6	3.71	49	34	36	2.42	4.2	139	19.0124	19.7299	1
1	75	17.0881	2	1	1	1	24	15	1.02	7.53	137	165	5.47	1.13	4.84071	12.3	26.7	3.44	45	32	29	2.53	3.9	143	14.4037	19.6205	1
1	68	9.59946	2	2	1	1	7.48	14	1.03	8.16	153	177	5.85	1.39	4.20863	10.5	24.2	2.13	46	22	33	2.32	3.4	140	14.6262	19.584	1
2	67	22.9395	1	1	1	1	6.72	15		8.65	139	167	6.47	1.55	4.17419	11.8	23.3	2.57	41	29	28	2.37	3.9	137	39.4199	19.448	1
1	81	13.9062	2	1	1	1	13.02	15	1.015	7.63	144	165	5.98	0.8	7.475	39.4	47.8	4.38	35	19	22	2.19	3.7	139	23.364	19.097	1
1	66	12.3834	2	1	1	1	3.51	13	1.022	9.69	149	219	8.07	1.04	7.75962	10.6	27.5	3.14	41	19	20	2.24	3.8	139	18.8411	18.9929	1
1	78	9.89839	2	1	1	1	3.12	15	1.017	6.07	147	207	4.22	1.18	3.57627	11.8	25.7	3.83	40	24	32	2.24	2.8	134	18.799	18.8897	1
2	49	10.5069	2	1	1	1	4.07	14	1.05	8.27	137	213	6.76	1.03	6.56311	10.1	25.3	2.21	43	33	38	2.32	3.4	141	29.2899	18.833	1
2	25	23.5833	2	1	2	1	23.2875	15	1.026	9.46	122	162	8.7	0.52	16.7308	12.1	23.8	3.34	40	25	23	2.27	4	135	33.7527	18.8115	1
1	35	14.9542	2	1	2	2	7	15	1.027	10.43	153	333	7.36	2.07	3.55556	10.2	25.2	4.09	44	24	21	2.44	3.8	141	18.9658	18.7612	1
1	66	22.8403	2	2	1	1	12.96	13	1.028	13.73	148	171	10.09	2.32	4.34914	12.1	31.7	3.95	48	30	30	2.31	4	150	33.562	18.6903	1
2	60	33.7699	2	2	1	1	1.365	15	1.022	2.09	90	1	0.75	1.17	0.641026	14.3	24.6	2.88	39	19	13	2.28	3.9	141	31.824	18.6726	1
1	40	17	2	2	1	1	17.632	10	1.033	8.05	144	231	4.89	2.38	2.05462	10.6	25.2	2.31	45	52	37	2.14	3.6	139	11.284	18.6368	1
1	43	15.4472	2	1	2	1	10.71	14	1.023	12.08	159	233	10.16	1.56	6.51282	10.7	27	7.83	46	18	21	2.35	4.2	141	14.8089	18.6253	1
1	57	10	2	1	1	1	5.67	15	1.026	5.83	141	357	3.78	1.25	3.024	10.5	26.2	2.32	62	13	23	2.11	4.2	143	17.2005	18.4675	1
2	71	21	1	1	1	1	5.544	14	1.031	11.04	123	160	9.57	0.76	12.5921	11.5	25.8	3.9	45	19	30	2.15	3.6	137	20.8693	18.4515	1
2	61	18	2	1	1	1	6.51	15	1.05	8.64	138	199	5.28	2.73	1.93407	11.2	23.7	3.44	45	29	27	2.31	4.1	140	23.0644	18.4201	1
1	88	21	2	2	1	1	1	15		5.45	133	93	3.62	1.58	2.29114	11.7	25.9	2.18	43	15	21	2.14	3.8	138	18.2383	18.0336	1
1	83	18.1153	2	1	1	1	1	15	1.03	6.82	135	288	4.62	1.61	2.86957	12.4	26.7	4.55	39	10	13	2.17	4.1	143	15.8754	17.9338	1
2	56	10.7889	2	1	1	1	15.3	15	1.034	7.08	139	220	4.02	2.21	1.819	11.3	22.6	4.59	38	21	28	2.26	3.6	141	27.1377	17.9239	1
1	73	17	2	1	1	1	4.32	15	1.041	6.04	123	165	68.4	23.5	2.91064	57.9	57.6	2.86	39	23	36	2.01	3.5	142	17.1749	17.5659	1
1	51	22.7882	2	1	1	1	13.8	14	1.022	10.37	148	386	8.62	0.92	9.36957	10.1	27.7	3.74	49	65	54	2.5	4.1	140	9.25075	17.3264	1
2	62	18.8007	2	1	1	1	5.4	15		4.33	116	230	2.59	1.36	1.90441	10.8	25.9	2.61	41	23	32	2.45	4.7	141	17.1014	17.1274	1
1	46	8.82639	2	1	1	1	1.725	15	1.021	6.53	146	219	5.03	1.04	4.83654	13.2	31.2	2.91	45	16	17	2.49	3.2	146	15.232	16.9534	1
1	41	8	1	1	1	1	1	15	1.019	9.18	169	264	5.41	2.79	1.93907	10.2	28.2	5.14	46	56	41	2.33	3.6	142	14.2688	16.8578	1
1	70	19	2	1	1	1	1.408	15	1.044	12.35	137	198	10.29	1.54	6.68182	11.8	24.8	4.29	40	13	18	2.22	4.2	141	20.944	16.8202	1
2	69	7.49369	2	1	1	1	3.64	15	1.025	4.07	123	236	2.34	1.47	1.59184	10.6	27.3	2.19	44	10	18	2.28	4	142	17.6316	16.5636	1
1	41	15	1	1	1	1	1	15		9.85	142	204	7.8	1.29	6.04651	10.6	23.9	4.2	39	27	31	2.29	3.7	139	13.5159	16.562	1
1	34	29.8377	2	1	2	1	23.52	14	1.039	9.31	146	233	7.89	0.92	8.57609	11.7	25.6	2.35	45	34	19	2.33	3.7	139	8.6257	16.4327	1
1	78	20.4201	1	1	2	1	1.785	15	10.16	10.64	142	213	9.84	0.61	16.1311	10.9	25	2.39	47	35	30	2.34	3.9	138	27.5466	16.4054	1
1	71	16.2625	2	2	1	1	24.65	11	1.021	8.06	112	353	6.88	0.75	9.17333	12.2	26.3	4.09	39	13	18	2.28	4.6	135	16.5013	16.3683	1
1	56	12.6382	2	1	1	1	2.34	15	1.038	8.45	181	129	5.3	2.6	2.03846	11.4	27.5	2.45	48	39	24	2.36	3.8	140	11.648	16.3682	1
1	83	10.7348	2	1	1	1	12.32	15	1.02	7.96	134	169	5.36	0.03	178.667	12.3	27.1	1.81	39	76	50	2.33	3.6	136	19.9494	16.284	1
1	58	13.809	2	2	1	1	15.912	11	1.023	8.51	133	198	6.74	1.24	5.43548	11.3	24.2	2.57	44	32	24	2.25	3.2	144	15.4193	15.9857	1
1	68	9.55417	2	2	2	1	5.2	15	1.026	14.2	137	285	7.72	5.13	1.50487	10.4	24.2	3.6	41	27	22	2.58	4.1	142	12.8811	15.3873	1
1	47	10.7597	2	1	1	1	5.625	15	1.035	2.5	136	84	1.24	0.92	1.34783	16.1	30.8	1.26	33	36	41	2.09	3.3	141	15.3012	15.3762	1
1	76	27	2	2	1	1	2.08	13	1.024	7.53	139	92	6.56	0.6	10.9333	11.6	29.4	3.03	38	11	15	2.08	4.3	136	22.639	15.2122	1
2	47	14	2	1	1	1	5.85	15		7.51	139	289	4.58	2.27	2.01762	11.3	25.2	2.66	42	10	11	2.57	3.6	142	14.4079	15.1262	1
1	71	9.2184	2	2	1	1	8.6	14	1.009	6.73	161	103	5.66	0.63	8.98413	8.7	30.2	2.045	47	39	36	2.28	3.7	143	14.8512	14.9961	1
1	69	9.84852	2	1	1	1	1.6	15		6.17	141	243	4.48	1.2	3.73333	11.5	27.5	2.53	37	36	33	2.13	3.7	138	26.1271	14.9216	1
1	52	21	2	1	1	1	14.3375	13	1.026	9.27	154	236	7.22	1.47	4.91156	10.9	24.5	1.92	43	43	41	2.27	3.4	141	18.1515	14.8681	1
1	58	8.475	2	2	1	1	2.8125	15	1.018	6.97	163	209	4.33	2.01	2.15423	11.3	27.7	7.28	40	19	22	2.35	3.2	146	14.3829	14.7947	1
1	70	15.0017	2	1	1	1	22.62	14		4.88	151	88	2.28	2.06	1.1068	12	26.6	2.57	46	27	30	2.45	4	133	28.6195	14.5799	1
1	37	21	2	1	1	1	21.84	14	1.036	9.84	159	212	8.29	1.12	7.40179	10.7	29.7	2.92	44	16	21	2.16	3.5	140	15.8934	14.5381	1
1	59	13.8764	2	1	1	1	2.6	15	1.033	4.24	109	48	2.97	0.87	3.41379	13.3	28	1.39	33	114	232	2.11	3.4	136	11.0957	13.5066	1
2	68	13.7276	1	1	2	1	1.6875	14	1.031	14.33	144	255	11.94	1.4	8.52857	9.8	21.5	3.7	42	43	32	2.26	3.7	138	23.6758	13.3952	1
1	60	9.66569	2	1	1	1	6.4	14	1.05	4.97	138	185	3.36	1.17	2.87179	10.6	26.7	3.14	40	30	36	2.18	3.6	139	23.2366	13.0775	1
1	51	14.5599	1	1	1	1	0.9	14	1.031	16.41	166	212	13.83	1.77	7.81356	10.9	22.5	3.01	46	35	26	2.28	3.8	138	10.2902	12.9543	1
1	82	8.46581	2	1	1	1	1	15	1.011	5.54	73	167	3.8	1.1	3.45455	11.5	22.5	3.86	35	17	26	2.09	6	144	10.7036	12.8233	1
1	57	22	2	1	2	1	14.994	15	1.024	7.24	159	276	4.73	1.64	2.88415	11.2	25.6	2.65	42	21	22	2.27	3.4	139	13.4073	12.0666	1
1	35	36	2	1	1	1	9	14	1.023	11.77	160	238	9.86	1.12	8.80357	11.7	25.1	5.35	49	10	16	2.47	4.1	140	5.04207	12.0587	1
1	73	14.7688	2	1	1	1	2.25	13	1.022	5.64	143	194	4.67	0.56	8.33929	11.7	28.8	4.14	37	19	26	2.3	4.2	142	14.895	11.6569	1
2	61	8	2	1	1	1	6.6	13	1.038	7.58	117	235	5.33	1.44	3.70139	10.8	24.6	3.47	44	14	19	2.25	4.1	143	32.1776	11.2877	1
1	60	11	2	1	1	1	9.8	14	1.031	5.5	126	285	4.4	0.78	5.64103	9.7	24.7	2.73	38	11	35	2.22	3.5	138	19.8016	9.98765	1
1	67	9	2	1	1	1	1	15	1.043	7.15	157	202	5.26	1.29	4.07752	9.8	22.9	2.65	39	29	22	2.18	3.8	144	22.1	8.99146	1
1	57	6.82868	2	1	1	1	15.6	15	1.021	4.13	159	131	3.02	0.69	4.37681	12.2	32.2	3.44	41	18	26	2.12	3.3	137	10.9558	7.79818	1
2	49	16	1	1	1	1	10	15	1.015	9.37	161	288	6.29	2.29	2.74672	11.4	25.7	3.35	43	14	17	1.62	3.8	137	23.205	7.57432	1
2	69	16	2	1	1	1	1.296	15		3.74	82	76	2.76	0.4	6.9	14.3	29.4	2.11	33	13	24	2.13	4	137	27.6218	7.48828	1
2	69	11.7854	2	1	1	1	1	15		6.37	121	207	3.27	2.26	1.4469	11.5	24.4	2.81	44	35	32	2.64	3.9	140	22.1268	7.30173	1
2	65	24	2	1	1	1	8.568	14		8.55	121	167	7.78	0.47	16.5532	10.9	25.7	3.29	46	23	38	2.23	3.9	139	20.111	6.33241	1
2	48	9	2	1	1	1	21.09	15	1.038	3.78	129	69	2.89	0.71	4.07042	13.3	24.4	1.65	41	28	34	2.2	3.4	142	11.648	6.014	1
1	48	26.6542	2	1	1	1	12.615	14		7.17	105	96	6.3	0.57	11.0526	11.2	25.9	2.83	41	7	16	1.95	4.6	124	5.69619	5.98919	1
