# Supplementary material for: The urea-creatinine ratio on the seventh day predicts the short-term prognosis of spontaneous intracerebral hemorrhage: a retrospective study
Source: PeerJ. 2025 Aug 18;13:e19874. doi: 10.7717/peerj.19874 (PMC12369599; doi:10.7717/peerj.19874)
Supplement: Supplemental Information 2 — Original, unprocessed data collected from the Department of Neurology, the Second Affiliated Hospital of Chongqing Medical University for the study, including the participants’ baseline clinical indicators, demographic information, and initial laboratory test results. [file peerj-13-19874-s002.xlsx]

## Sheet: Sheet1
Gender	Age	Hospitalization_time	Bleeding_site	Intraventricular_extension	Hematoma_shape	Bleeding_volume	GCS	Urine_specific_gravity	WBC	HB	PLT	Neutrophils_Absolute Value	Lymphocytes_Absolute Value	NLR	PT	APTT	FIB	D2	ALB	ALT	AST	Ca	K	Na	BCR_day7	BCR_group(30.68)	MRS_score	MRS_group
2	71	12	1	1	1	8.4525	15	1.015	5.67	130	391	3.7	1.68	2.20238	11.8	34.3	3.38	175	40.6	12	21	2.58	3.9	136.7	9.50662	1	1	1
1	54	8	1	2	1	11.7512	15		14.63	138	246	13.86	0.4	34.65	13.9	31	2.71	141.5	44.2	46	30	2.33	3.65	140	12.7851	1	1	1
2	61	7	1	2	1	5.88	15		8.6	136	95	6.8	1.44	4.72222	13	36	3.55	780.2	42.5	11	15	2.31	3.46	131.4	13.5011	1	0	1
1	44	33	1	1	1	14.2975	15		12.76	150	379	8.32	3.35	2.48358	12	36.4	2.36		46.1	25	13	2.42	3.91	133.3	13.5341	1	1	1
1	58	8	1	2	1	7.8	15	1.02	11.43	133	242	9.49	1.18	8.04237	12.9	30.5	3.81	299.4	43.3	25	49	2.3	3.35	139.8	13.7278	1	1	1
1	83	8	1	1	1	3.52	15	1.015	6.83	120	210	5.42	0.8	6.775	13.7	37.5	3	645.4	34.2	17	26	2.26	3.21	141.6	13.7511	1	4	1
2	83	21	1	1	1	15	15		5.83	108	253	3.68	1.48	2.48649	13.1	29.4	3.57		35.2	8	8	2.08	3.17	140.7	14.3423	1	1	1
2	55	14	1	1	1	1	15	1.015	3.62	128	166	2.12	1.18	1.79661	12.5	36.1	2.24	90.2	42.9	25	23	2.34	4.1	138.6	14.9738	1	0	1
1	50	13	1	1	1	20.02	15	1.03	9.73	146	139	7.83	1.25	6.264	13.6	30.7	4.58	319.1	42.2	32	36	2.14	3.37	144.2	16.1355	1	4	1
1	65	9	1	2	1	4.8875	15	1.02	10.01	133	164	7.8	1.5	5.2	12.7	32.3	3.12		38.7	19	20	2.2	3.62	141.2	16.3252	1	1	1
1	83	8	1	1	1	7.2	15	1.015	5.36	151	116	3.57	1.28	2.78906	13.5	32.5	2.83	237	42.7	13	17	2.38	3.77	136.2	16.7971	1	6	1
2	43	11	1	2	1	15.295	15	1.025	11.2	132	258	8.92	1.19	7.4958	13.2	36.8	5.22		42.8	19	21	2.34	3.93	135.8	17.6883	1	4	1
1	69	8	1	1	1	8.82	12	1.015	11.76	145	245	10.31	1.02	10.1078	12.9	32.8	2.75	61.1	42.6	14	16	2.24	3.61	137.8	18.0761	1	4	1
1	70	26	1	1	1	19.89	15	1.015	4.87	132	114	2.55	1.58	1.61392	12.3	39.7	3.59	261.3	40.4	14	23	2.18	3.42	137.8	18.2546	1	0	1
1	75	8	1	1	1	18.04	15	1.015	5.29	110	159	4.47	0.5	8.94	13.3	35	2.79	2097.8	43.2	14	22	2.24	3.27	137.7	18.3894	1	2	1
1	72	14	1	1	1	4.68	15	1.015	5.62	132	265	3.7	0.96	3.85417	12.7	34.2	2.88		35.8	6	20	2.33	3.74	140.4	18.5973	1	1	1
2	73	8	1	1	1	10.71	14		5.4	112	148	3.99	1.03	3.87379	13.2	33.8	2.52	90.1	39.8	22	28	2.32	4.53	140.3	18.7458	1	2	1
2	45	11	1	1	1	8.4	15	1.01	6.95	129	199	5.69	0.91	6.25275	11.9	37.7	3.26	112.6	42.8	4	14	2.24	3.62	140.9	18.9432	1	1	1
1	36	12	1	2	2	1.456	15	1.025	8.38	159	196	6.46	1.5	4.30667	12.2	29.6	2.26	98.7	46.9	34	17	2.47	3.43	138.1	19.9871	1	1	1
2	56	12	1	2	1	4.59	15	1.015	8.73	132	197	5.85	2.49	2.3494	12.2	29.2	2.78	173.1	42.5	14	20	2.39	3.41	136.9	20.4037	1	1	1
1	71	8	1	1	1	0.66	15	1.015	5.82	127	255	3.1	1.36	2.27941	12.7	31.7	3.36	111.1	40.4	31	23	2.24	3.72	137.2	20.5214	1	3	1
1	71	11	1	1	1	13.94	15	1.03	6.79	137	113	5.37	0.95	5.65263	13.1	32.6	1.76	344.4	43.1	36	43	2.36	3.84	136.6	20.641	1	1	1
1	63	7	1	1	1	3.3	15		4.72	133	222	3.01	1.16	2.59483	12.9	37	3.69	249.6	39.4	21	20	2.33	3.92	137.7	20.7836	1	0	1
2	55	8	1	1	1	1	15		7.3	156	190	5.74	1.22	4.70492	12.6	32.7	2.53	71.9	37.7	9	13	2.3	3.81	140.2	20.8693	1	1	1
1	66	11	1	2	1	6.3	15	1.01	7.59	157	224	4.82	2.1	2.29524	12.5	34.3	3.39	140.7	43.1	22	24	2.39	3.44	138.5	21.0422	1	0	1
1	50	17	1	2	1	10.4	8	1.015	11.35	151	194	9.87	1	9.87	12.4	30.3	3.22	97.1	47.6	15	24	2.27	3.44	141.5	21.127	1	5	1
1	55	9	1	1	1	1.125	15		8.41	145	294	5.72	2.18	2.62385	13	37.6	3.8	60.9	46.7	28	20	2.37	3.62	143.1	21.1635	1	1	1
2	72	7	2	2	1	3.25	15		10.01	142	183	9.25	0.49	18.8776	12.8	27.3	2.23	125.4	47.3	21	25	2.34	3.42	138.7	21.3344	1	0	1
2	68	11	1	1	1	3.38	15	1.025	6.15	118	358	3.93	1.78	2.20787	12.6	33.7	2.6	249	38.4	13	14	2.39	3.85	142.9	21.6267	1	1	1
1	82	24	1	2	1	15.75	15	1.025	7.91	146	234	6.8	0.74	9.18919	20	37.5	3.91	96.5	45.2	14	18	2.37	3.59	132.1	21.6332	1	1	1
1	75	8	2	1	1	3.23	14		11.15	154	211	8.57	1.93	4.44041	13.7	34.2	3.6	202.6	44.9	26	26	2.51	3.69	140.6	21.6895	1	3	1
1	56	11	1	1	1	11.2	15	1.02	7.41	155	237	5.27	1.63	3.23313	12.9	36.9	2.44	55.8	45.5	11	19	2.45	3.86	142.7	21.8121	1	1	1
1	64	13	1	1	1	4.9875	15	1.015	7.36	148	209	3.83	2.45	1.56327	13.3	47.4	3.12	64.9	38.7	19	20	2.42	3.26	137.8	21.9168	1	0	1
1	73	15	1	1	1	11.001	15	1.015	8.66	146	228	7.17	0.79	9.07595	13.2	51	3.78	1557.9	42.6	10	19	2.26	4.17	136.3	21.9188	1	1	1
1	70	17	1	2	1	2.7	15	1.015	5.8	122	150	3.68	1.2	3.06667	13.4	32.2	3.08	121.6	39.7	22	19	2.14	3.59	138.3	21.9539	1	0	1
1	54	13	1	1	1	2.42	15	1.02	5.68	165	141	4.24	1.12	3.78571	12.1	32.8	3.24	＜50	51.8	40	21	2.41	4.42	134.8	22.4554	1	0	1
1	47	13	1	1	1	1	15	1.03	7.93	154	311	6.2	1.27	4.88189	12.8	35.9	2.82		43.6	17	16	2.34	3.39	140.1	22.7598	1	0	1
1	62	10	1	2	1	15.68	15		7.99	158	213	7.33	0.47	15.5957	12	21.9	2.28	118.1	44.9	30	56	2.35	3.47	142.3	22.7626	1	1	1
1	55	9	1	1	1	12.87	15	1.015	6.99	159	195	4.8	1.35	3.55556	32.3	51.7	2.58	＜50	37.2	37	32	2.07	3.54	141.6	23.6413	1	1	1
2	88	10	1	1	1	11.88	15	1.015	7.21	96	180	6.28	0.69	9.10145	13	37.9	2.93	206.2	38.6	8	22	2.3	3.35	132.2	23.6595	1	1	1
1	25	8	1	1	1	3.432	15	1.025	9.39	161	267	7.09	1.57	4.51592	12.3	29.2	2.4	＜50	46	74	36	2.4	3.85	136.4	24.0778	1	0	1
1	59	49	2	2	1	3.825	15	1.015	6.19	140	142	5	0.81	6.17284	13.3	29.2	2.87	415.1	46.6	43	28	2.44	3.75	140.9	24.0842	1	3	1
1	63	24	1	1	1	4.83	15		8.27	139	162	6.18	1.33	4.64662	12.9	39	6.83	563.6	41.3	20	35	2.17	3.91	138	24.4454	1	5	2
1	39	8	1	1	1	10.64	15		8.76	168	237	7.24	0.88	8.22727	13	30.3	3.87	50	51.5	21	17	2.51	3.82	137.4	25.9219	1	1	2
1	78	24	1	1	2	12.25	15	1.015	6.48	140	211	4.5	1.58	2.8481	13.9	32.4	4.36	251.6	38.4	8	18	2.37	3.51	139.3	26.0037	1	5	2
2	42	14	1	1	1	11.6025	14	1.02	8.21	126	272	6.08	1.78	3.41573	11.6	33	3.84	250.7	48.7	27	24	2.47	3.67	137.5	26.3245	1	0	2
1	75	15	1	2	2	20.52	14	1.015	6.2	126	99	4.63	0.82	5.64634	14.6	37.7	5.34	1233	35.4	27	49	2.13	3.34	136.7	26.6456	1	4	2
1	84	14	1	2	1	10.374	15	1.01	9.99	134	229	8.08	1.19	6.78992	14.9	33.8	4.37		43.7	17	12	2.34	3.77	134.6	26.936	1	3	2
1	55	28	1	1	1	10.0625	15		6.56	145	177	3.55	2.38	1.4916	12.7	27.3	2.53	165.1	41.6	9	19	2.32	3.37	139.6	26.9993	1	4	2
1	58	8	1	1	1	1.62	15	1.03	11.96	155	236	9.51	1.67	5.69461	12.5	32.2	5.36	＜50	50.1	34	39	2.58	4.26	132.9	27.0581	1	6	2
1	55	13	1	1	1	8.1	15	1.02	15.7	164	285	13.01	1.88	6.92021	12.2	38.2	3.27	/	40.5	16	17	2.28	4.26	137.8	27.7782	1	0	2
1	70	16	1	2	1	6.25	15		8.48	166	174	6.82	0.86	7.93023	13.3	33.9	3.59	79.2	41.6	25	23	2.12	3.62	136.7	28.0127	1	3	2
1	55	9	1	1	1	4.375	15		8.32	139	212	6.3	1.62	3.88889	12.9	32.8	3.17	121.4	42.3	10	16	2.35	3.24	139.9	28.9141	1	4	2
2	68	20	1	1	1	1.925	15	1.02	6.47	156	195	4.51	1.51	2.98675	13.6	29.4	2.88		40.5	19	18	2.23	3.36	144.7	29.5057	1	1	2
1	82	13	2	1	1	22.176	15		10.72	146	118	9.21	0.88	10.4659	13.7	30.4	3.18		44.7	12	19	2.21	3.72	139.4	29.9317	1	5	2
2	57	12	1	1	1	0.675	15	1.015	6.41	133	200	5.67	0.5	11.34	12.3	33.7	2.99	117.3	44.3	33	23	2.37	3.47	134.8	30.5413	1	0	2
1	85	16	1	2	1	7.6125	15	1.01	8.95	134	146	7.14	1.2	5.95	14	42.2	3.98	679	40.3	11	17	2.16	3.99	136.4	31.4112	2	4	2
2	70	10	1	1	2	14.28	15	1.03	6.28	125	220	4.48	1.16	3.86207	13	30.6	3.9	826.9	41.9	13	18	2.45	4.53	133.8	31.7916	2	3	2
2	79	19	1	1	1	1.1704	15	1.02	7.55	149	143	5.71	1.1	5.19091	14.4	31.3	4.57	1521.7	36.1	21	25	2.42	4.07	138.2	33.1902	2	2	2
1	69	9	2	1	1	1	15	1.015	6.04	100	320	4.47	1.29	3.46512	14.7	40.4	5.8	4855.9	31.8	15	113	2.07	3.37	125.5	33.8673	2	6	2
1	89	26	1	1	2	8.4	5	1.02	10.6	95	157	8.39	1.41	5.95035	13.3	37.6	6.93	802.4	33.7	20	22	2.12	4.21	136.4	34.5577	2	5	2
1	74	36	2	2	1	22.88	4		7.73	126	133	3.87	2.65	1.46038	13.3	31.3	2.5	202.9	35.8	23	41	2.16	2.85	141.9	36.4893	2	5	2
2	58	25	1	2	1	9.9225	11	1.02	7.21	129	242	5.75	1.1	5.22727	12.7	36.7	3.78	97.7	46.4	18	17	2.29	3.69	136.4	39.1845	2	3	2
1	68	16	1	2	1	4.4625	13	1.015	15.53	138	249	14.55	0.71	20.493	13.7	36.3	3.17	2249	48.7	13	23	2.28	3.36	137.9	67.3975	2	5	2
